# Supplementary material for: O-GlcNAcylation homeostasis controlled by calcium influx channels regulates multiple myeloma dissemination
Source: Springer Nature journal article supplement (doi:10.1186/s13046-021-01876-z), 2021-03-16
Supplement: MOESM1 [file 18971874]

### Supplementary Table S1. The Oligos sequences of single guide RNA (sgRNA)

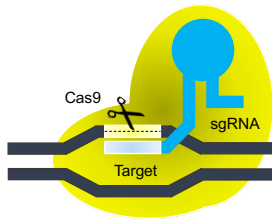

Schematic illustration of CRISPR/Cas9-mediated TRPM7, ORAI1 and STIM1 knockdown. sgRNA sequences that specifically recognize the target DNA region.

| Oligo name | Oligo sequence (5'–3') |
|------------|------------------------|
| sgTRPM7    | CAAATATAAGTGCCACCACA   |
| sgORAI1    | CAACGTGCACAATCTCAACT   |
| sgSTIM1    | CTCAGTATGAGGAGACCTTC   |
| sgMGEA5    | GGTGTGGATAGCAACGTAGT   |
| sgITGA4    | GTGTTTGTGTACATCAACTC   |
| sgITGB7    | GGGACGCACAAGCCTTCGAG   |
